# Supplementary material for: Simple, rapid, sensitive, selective and label-free lincomycin detection by using HAuCl4and NaOH
Source: Royal Society of Chemistry journal article supplement (doi:10.1039/c9ra04095a), 2019-01-01
Supplement: c9ra04095a1.pdf [file c9ra04095a1.pdf]

## Electronic Supplementary Information (ESI)

### Simple, rapid, sensitive, selective and label-free lincomycin detection by using HAuCl<sub>4</sub> and NaOH

Yumin Leng<sup>\*a</sup>, Fang Hu<sup>c</sup>, Chunhua Ma<sup>a</sup>, Chenxi Du<sup>a</sup>, Linfeng Ma<sup>a</sup>, Jiao Xu<sup>a</sup>, Qiyuan Lin<sup>a</sup>, Zhipei Sang<sup>\*b</sup> and  
Zhiwen Lu<sup>\*a</sup>

<sup>a</sup>College of Physics and Electronic Engineering, Nanyang Normal University, Nanyang 473061, China.

<sup>b</sup>College of Chemistry and Pharmaceutical Engineering, Nanyang Normal University, Nanyang 473061,  
China.

<sup>c</sup>Faculty of Materials Science and Chemical Engineering, Ningbo University, Ningbo 315211, China

#### Corresponding Author

\*E-mail: [yumin\\_leng@126.com](mailto:yumin_leng@126.com) , [sangzhipei@126.com](mailto:sangzhipei@126.com) , [lzw@nynu.edu.cn](mailto:lzw@nynu.edu.cn)

## Supplementary Figures

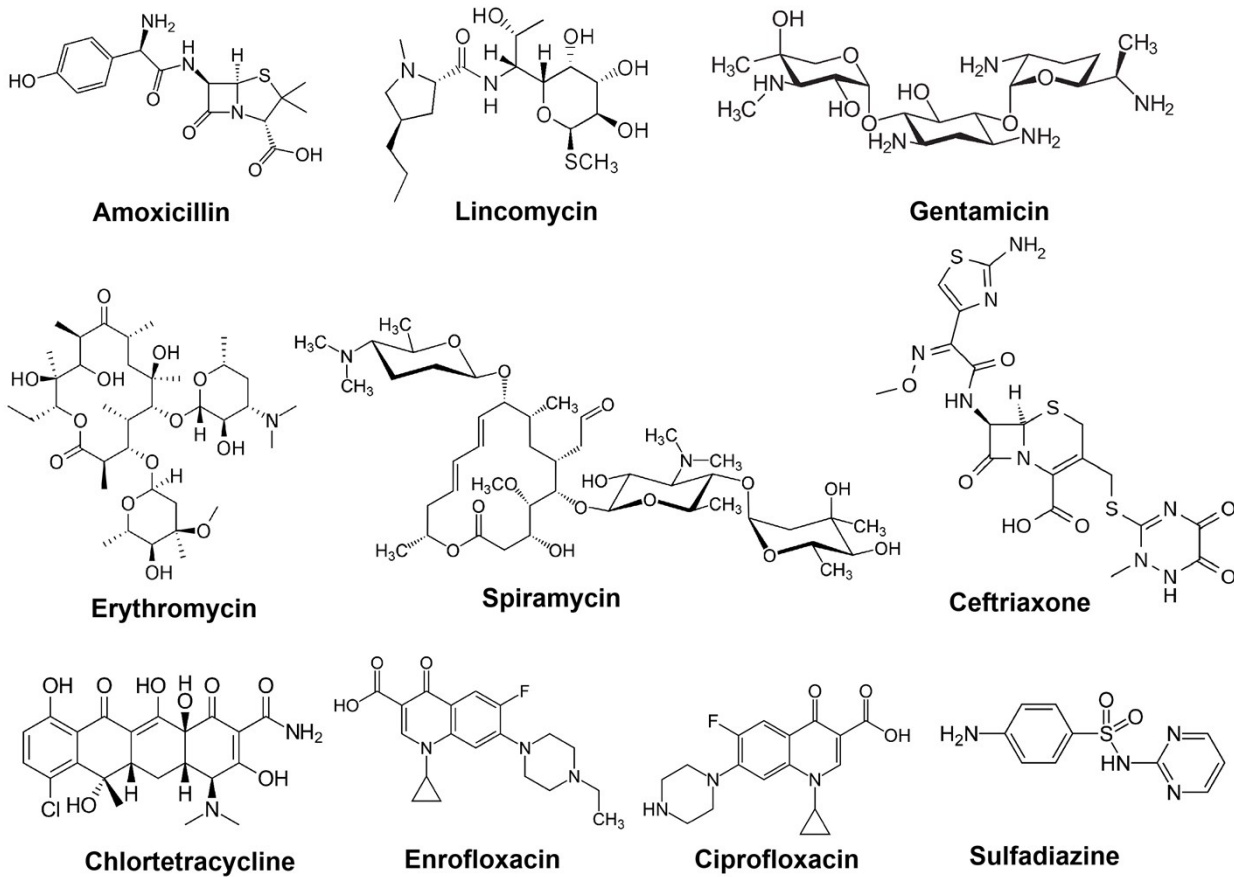

**Fig. S1.** Structures of 10 common antibiotics (amoxicillin, lincomycin, gentamicin, erythromycin, spiramycin, ceftriaxone, chlortetracycline, enrofloxacin, ciprofloxacin, and sulfadiazine).

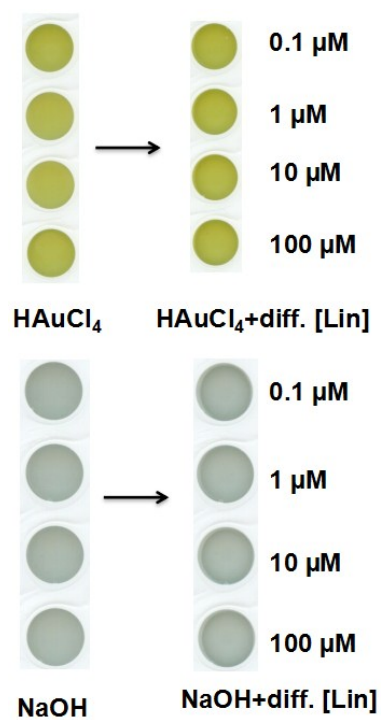

**Fig. S2.** Color images of the HAuCl<sub>4</sub> and NaOH solution exposure to different concentrations of Lin, respectively.

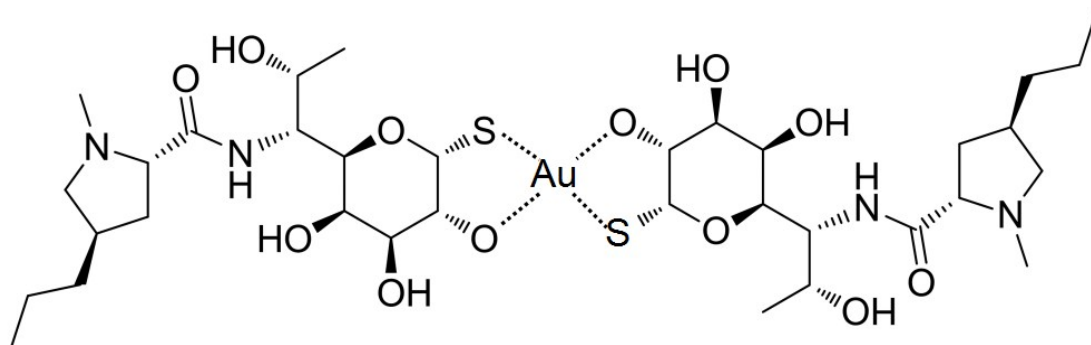

**Fig. S3.** Schematic representation of the sensing procedure for colorimetric detection of Lin based on chelation interaction between Au and Lin.

## Supplementary Table

**Table S1.** The equation and parameters for limit of detection (LOD) calculation.

| Y = A + S × X                 |       |       |       |      |   |         |
|-------------------------------|-------|-------|-------|------|---|---------|
| Parameter                     | A     | S     | R     | SD   | N | P       |
| Lin in double distilled water | 55.65 | 3.88  | 0.998 | 1.26 | 6 | <0.0001 |
| Lin in real sample            | 6.99  | 11.07 | 0.997 | 3.46 | 5 | <0.0001 |

A = Y-intercept, S = slope, R = correlation, SD = standard deviation, N = number of data points, P = probability value.

The limit of detection (LOD) could be obtained by the above equation and parameters.

$$\text{LOD}_{\text{water}} = 3 \times \text{SD} / \text{S} = 3 \times 1.26 / 3.88 \mu\text{M} = 0.97 \mu\text{M}$$

$$\text{LOD}_{\text{sample}} = 3 \times \text{SD} / \text{S} = 3 \times 3.46 / 11.07 \mu\text{M} = 0.94 \mu\text{M}$$
